# Supplementary material
Source: HighWire-hosted journal article supplement (https://www.cmajopen.ca/highwire/filestream/81130/field_highwire_adjunct_files/1/2018-0025-2-at.pdf)
Supplement: 2018-0025-2-at.pdf [file 2018-0025-2-at.pdf]

**Appendix 2 (as supplied by the authors): Subset of 14 International Tobacco Control Four Country Smoking and Vaping Survey measures of smokers' support for endgame measures used in this study**

| <b>Endgame measure</b>                                                                                                                                                                       | <b>Response options<sup>†</sup></b>                |
|----------------------------------------------------------------------------------------------------------------------------------------------------------------------------------------------|----------------------------------------------------|
| 1. "Would you support or oppose a law that bans the use of promotional marketing for cigarettes/tobacco, such as coupons and price discounts?"                                               | Strongly support/support<br>Strongly oppose/oppose |
| 2. "Would you support or oppose a law that totally bans cigarettes and other smoked tobacco within 10 years, if the government provides assistance such as clinics to help smokers quit?"    | Strongly support/support<br>Strongly oppose/oppose |
| 3. "Tobacco companies should be required to sell cigarettes in plain packages; that is, in packs without the usual brand colours and symbols, but keeping warning labels."                   | Strongly agree/agree<br>Strongly disagree/disagree |
| 4. "If you could get nicotine in products other than tobacco, would you support or oppose a law that reduced the amount of nicotine in cigarettes and tobacco, to make them less addictive?" | Strongly support/support<br>Strongly oppose/oppose |
| 5. "Would you support or oppose a law that bans all additives, including flavourings, in cigarettes/tobacco?"                                                                                | Strongly support/support<br>Strongly oppose/oppose |
| 6. "Would you support or oppose a law that bans the use of menthol in cigarettes/tobacco?"                                                                                                   | Strongly support/support<br>Strongly oppose/oppose |
| 7. "Would you support or oppose a law that raises the legal age of purchasing cigarettes/tobacco to 21 years and older?"                                                                     | Strongly support/support<br>Strongly oppose/oppose |
| 8. "Would you support or oppose a law that restricts the number of places where cigarettes/tobacco could be purchased?"                                                                      | Strongly support/support<br>Strongly oppose/oppose |
| 9. "Would you support or oppose a law that requires shops/stores that sell cigarettes/ tobacco to also sell alternative nicotine products like e-cigarettes and nicotine medications?"       | Strongly support/support<br>Strongly oppose/oppose |
| 10. "Would you support or oppose a law that requires the same minimum age for buying e-cigarettes as for cigarettes?"                                                                        | Strongly support/support<br>Strongly oppose/oppose |
| 11. "Would you support or oppose a law that limits the amount of nicotine allowed in e-cigarettes and/or e-liquid?"                                                                          | Strongly support/support<br>Strongly oppose/oppose |
| 12. "Would you support or oppose a law that bans the use of e-cigarettes in places where smoking is already banned?"                                                                         | Strongly support/support<br>Strongly oppose/oppose |
| 13. "Would you support or oppose a law that bans e-cigarette and e-liquid promotions, such as free samples, coupons, and price discounts?"                                                   | Strongly support/support<br>Strongly oppose/oppose |
| 14. "Would you support or oppose a law that bans fruit and candy flavours in e-cigarettes?"                                                                                                  | Strongly support/support<br>Strongly oppose/oppose |

<sup>†</sup>Response options for the question on support for plain packaging were: strongly agree, agree, neither agree or disagree, disagree, strongly disagree, refused, and don't know. For all other questions, response options were: strongly support, support, oppose, strongly oppose, refused, and don't know. For analysis, response options were dichotomized into "strongly agree/agree" versus "strongly disagree/disagree" or "strongly support/support" versus "strongly oppose/oppose". All other response options ("refused" and "don't know") were excluded.
